# Supplementary material for: Enzymatically crosslinked gelatin hydrogel promotes the proliferation of adipose tissue-derived stromal cells
Source: PeerJ. 2016 Sep 27;4:e2497. doi: 10.7717/peerj.2497 (PMC5045885; doi:10.7717/peerj.2497)
Supplement: Supplemental Information 4 [file peerj-04-2497-s004.xlsx]

## Sheet: Sheet1
ArmarBlue assay																	2D culture
2D culture																	Days	2% gel		4% gel		6% gel		8% gel		TCP
TCP	0d	2d	4d	6d	8d	10d	12d	14d	16d	18d	20d	22d	24d	26d	28d		0	5	0	5	0	5	0	5	0	5	0
	5	24	70	135	240	250	240	210	197	170	147	134	118	97	73		2	6	1	7.66667	1.52753	12	3	7	1	25	4.58258
	5	30	75	167	268	260	263	238	216	205	182	163	132	104	95		4	14.6667	1.52753	15.3333	2.3094	28.6667	5.03322	16.6667	3.05505	70	5
	5	21	65	128	230	237	240	207	189	187	152	140	123	98	87		6	26.3333	6.80686	31.3333	6.50641	66.3333	19.5533	43	11.3578	143.333	20.7926
	5	25	70	143.333	246	249	247.667	218.333	200.667	187.333	160.333	145.667	124.333	99.6667	85		8	45	8.544	60.6667	4.50925	95	9.53939	91.3333	6.02771	246	19.6977
	0	4.58258	5	20.7926	19.6977	11.5326	13.2791	17.0978	13.8684	17.5024	18.9297	15.308	7.0946	3.78594	11.1355		10	81	12.1655	99	12.53	143.333	13.4288	139	4.58258	249	11.5326
																	12	105.333	7.50555	127.333	3.78594	173.667	10.504	161.333	7.23418	247.667	13.2791
																	14	122	16.6433	165.333	10.2632	211	18.5203	193.333	5.68624	218.333	17.0978
2% gel	0d	2d	4d	6d	8d	10d	12d	14d	16d	18d	20d	22d	24d	26d	28d		16	146.667	20.2567	203.667	14.0475	233.333	10.4083	238	7.54983	200.667	13.8684
	5	5	16	24	46	87	113	103	124	146	120	129	89	97	87		18	163.333	15.5349	250.333	19.1398	286	18.5203	279.667	10.116	187.333	17.5024
	5	6	13	34	36	67	105	134	163	168	139	136	123	104	89		20	129.333	9.50438	246	12.1655	339	12.7671	303	22.3383	160.333	18.9297
	5	7	15	21	53	89	98	129	153	176	129	120	131	114	94		22	128.333	8.02081	225.333	12.8582	344	8.544	320	13.1149	145.667	15.308
	5	6	14.6667	26.3333	45	81	105.333	122	146.667	163.333	129.333	128.333	114.333	105	90		24	114.333	22.301	202.667	37.2335	350.667	11.0151	340.667	14.0119	124.333	7.0946
	0	1	1.52753	6.80686	8.544	12.1655	7.50555	16.6433	20.2567	15.5349	9.50438	8.02081	22.301	8.544	3.60555		26	105	8.544	167.333	35.5715	344.667	6.4291	356	7.2111	99.6667	3.78594
																	28	90	3.60555	143.667	38.8373	346.667	5.03322	358.333	14.0119	85	11.1355
4% gel	0d	2d	4d	6d	8d	10d	12d	14d	16d	18d	20d	22d	24d	26d	28d
	5	8	18	38	65	112	130	174	217	268	260	240	245	208	187
	5	6	14	25	56	98	129	168	189	230	240	220	188	142	112
	5	9	14	31	61	87	123	154	205	253	238	216	175	152	132
	5	7.66667	15.3333	31.3333	60.6667	99	127.333	165.333	203.667	250.333	246	225.333	202.667	167.333	143.667
	0	1.52753	2.3094	6.50641	4.50925	12.53	3.78594	10.2632	14.0475	19.1398	12.1655	12.8582	37.2335	35.5715	38.8373
6% gel	0d	2d	4d	6d	8d	10d	12d	14d	16d	18d	20d	22d	24d	26d	28d
	5	12	28	68	96	149	184	232	245	304	350	345	350	340	342
	5	15	34	85	104	153	174	197	230	267	325	335	340	342	346
	5	9	24	46	85	128	163	204	225	287	342	352	362	352	352
	5	12	28.6667	66.3333	95	143.333	173.667	211	233.333	286	339	344	350.667	344.667	346.667
	0	3	5.03322	19.5533	9.53939	13.4288	10.504	18.5203	10.4083	18.5203	12.7671	8.544	11.0151	6.4291	5.03322
8% gel	0d	2d	4d	6d	8d	10d	12d	14d	16d	18d	20d	22d	24d	26d	28d
	5	7	14	35	85	134	153	187	237	286	310	318	325	348	347
	5	6	20	56	92	140	166	195	231	268	278	308	345	358	354
	5	8	16	38	97	143	165	198	246	285	321	334	352	362	374
	5	7	16.6667	43	91.3333	139	161.333	193.333	238	279.667	303	320	340.667	356	358.333
	0	1	3.05505	11.3578	6.02771	4.58258	7.23418	5.68624	7.54983	10.116	22.3383	13.1149	14.0119	7.2111	14.0119
3D culture
2% gel	0d	2d	4d	6d	8d	10d	12d	14d	16d	18d	20d	22d	24d	26d	28d		3D culture
	5	5	12	18	34	45	43	23	24	25	23	20	21	23	18		Days	2% gel		4% gel		6% gel		8% gel
	5	4	7	25	45	57	56	34	35	32	32	30	26	25	24		0	5	0	5	0	5	0	5	0
	5	5	12	23	43	56	50	48	47	42	42	40	36	35	32		2	4.66667	0.57735	6.66667	1.1547	5	1	4.33333	1.1547
	5	4.66667	10.3333	22	40.6667	52.6667	49.6667	35	35.3333	33	32.3333	30	27.6667	27.6667	24.6667		4	10.3333	2.88675	14	2	11.6667	1.52753	7	1.73205
	0	0.57735	2.88675	3.60555	5.85947	6.65833	6.50641	12.53	11.5036	8.544	9.50438	10	7.63763	6.4291	7.02377		6	22	3.60555	48	3	16.6667	3.05505	15	2
																	8	40.6667	5.85947	87.3333	9.50438	41.6667	6.1101	35.3333	12.3423
																	10	52.6667	6.65833	144	9.53939	76.3333	7.63763	77.6667	31.5013
4% gel	0d	2d	4d	6d	8d	10d	12d	14d	16d	18d	20d	22d	24d	26d	28d		12	49.6667	6.50641	178.667	19.8578	113	8.88819	113	21.3776
	5	6	14	48	78	145	187	231	243	240	212	153	121	132	92		14	35	12.53	231.333	13.5031	151	6.245	163.333	18.1751
	5	6	12	45	87	134	156	218	223	234	209	134	108	108	89		16	35.3333	11.5036	240.667	16.6233	174.667	13.3167	204.333	17.2434
	5	8	16	51	97	153	193	245	256	246	208	167	123	125	102		18	33	8.544	240	6	214	15.3948	268.333	32.5935
	5	6.66667	14	48	87.3333	144	178.667	231.333	240.667	240	209.667	151.333	117.333	121.667	94.3333		20	32.3333	9.50438	209.667	2.08167	250	15.1327	319	29.5127
	0	1.1547	2	3	9.50438	9.53939	19.8578	13.5031	16.6233	6	2.08167	16.563	8.14453	12.3423	6.80686		22	30	10	151.333	16.563	306.333	11.9304	371.667	24.3379
																	24	27.6667	7.63763	117.333	8.14453	361.333	16.0416	414.667	14.7422
																	26	27.6667	6.4291	121.667	12.3423	395.667	12.5033	458.333	20.0083
6% gel	0d	2d	4d	6d	8d	10d	12d	14d	16d	18d	20d	22d	24d	26d	28d		28	24.6667	7.02377	94.3333	6.80686	421.333	20.0333	462.667	9.50438
	5	5	12	14	35	68	103	153	178	210	245	301	360	390	420
	5	4	10	16	43	78	120	156	186	231	267	320	378	410	442
	5	6	13	20	47	83	116	144	160	201	238	298	346	387	402
	5	5	11.6667	16.6667	41.6667	76.3333	113	151	174.667	214	250	306.333	361.333	395.667	421.333
	0	1	1.52753	3.05505	6.1101	7.63763	8.88819	6.245	13.3167	15.3948	15.1327	11.9304	16.0416	12.5033	20.0333
8% gel	0d	2d	4d	6d	8d	10d	12d	14d	16d	18d	20d	22d	24d	26d	28d
	5	5	5	13	25	46	89	143	189	232	289	367	426	459	463
	5	5	8	15	32	78	120	169	201	278	320	350	398	438	453
	5	3	8	17	49	109	130	178	223	295	348	398	420	478	472
	5	4.33333	7	15	35.3333	77.6667	113	163.333	204.333	268.333	319	371.667	414.667	458.333	462.667
	0	1.1547	1.73205	2	12.3423	31.5013	21.3776	18.1751	17.2434	32.5935	29.5127	24.3379	14.7422	20.0083	9.50438
