# Supplementary material for: Enzymatically crosslinked gelatin hydrogel promotes the proliferation of adipose tissue-derived stromal cells
Source: PeerJ. 2016 Sep 27;4:e2497. doi: 10.7717/peerj.2497 (PMC5045885; doi:10.7717/peerj.2497)
Supplement: Supplemental Information 6 [file peerj-04-2497-s006.xlsx]

## Sheet: Sheet1
细胞在3d材料中的迁徙试验			Cell migration in 3D hydrogels
2% gel	0d	2d	4d	6d	8d	10d	12d	14d			Time	2% gel		4% gel		6% gel		8% gel
	0	0.23	1.52	2.51	3.81	5.2	6.8	8.9			0	0	0	0	0	0	0	0	0
	0	0.4	1.47	2.7	3.99	5.3	7.1	9.1			2	0.3275	0.0727438	0.1375	0.0170783	0.07	0.0424264	0.0525	0.0377492
	0	0.36	1.52	2.83	3.69	5.02	6.82	9.24			4	1.585	0.165025	0.5325	0.085	0.23	0.0483046	0.145	0.0351188
	0	0.32	1.83	2.47	4.23	5.6	7.53	10.2			6	2.6275	0.168201	1.0425	0.118989	0.43	0.0969536	0.345	0.0591608
	0	0.3275	1.585	2.6275	3.93	5.28	7.0625	9.36			8	3.93	0.234947	1.7025	0.114419	0.795	0.106615	0.7225	0.0767572
	0	0.0727438	0.165025	0.168201	0.234947	0.242762	0.340429	0.577119			10	5.28	0.242762	2.535	0.18735	1.5225	0.205649	1.475	0.322542
											12	7.0625	0.340429	4.05	0.187794	2.11	0.187439	2.045	0.2504
											14	9.36	0.577119	5.1575	0.199729	3.9825	0.2864	3.4725	0.2381
4% gel	0d	2d	4d	6d	8d	10d	12d	14d
	0	0.13	0.45	1.04	1.78	2.63	3.97	5.3
	0	0.14	0.47	1.21	1.82	2.73	4.32	5.12
	0	0.16	0.62	0.98	1.62	2.3	4.02	4.89
	0	0.12	0.59	0.94	1.59	2.48	3.89	5.32
	0	0.1375	0.5325	1.0425	1.7025	2.535	4.05	5.1575
	0	0.0170783	0.085	0.118989	0.114419	0.18735	0.187794	0.199729
6% gel	0d	2d	4d	6d	8d	10d	12d	14d
	0	0.02	0.25	0.37	0.82	1.32	1.92	3.62
	0	0.05	0.16	0.42	0.68	1.78	2.36	4.32
	0	0.1	0.27	0.57	0.93	1.59	2.13	4.01
	0	0.11	0.24	0.36	0.75	1.4	2.03	3.98
	0	0.07	0.23	0.43	0.795	1.5225	2.11	3.9825
	0	0.0424264	0.0483046	0.0969536	0.106615	0.205649	0.187439	0.2864
8% gel	0d	2d	4d	6d	8d	10d	12d	14d
	0	0.01	0.17	0.26	0.64	1.02	1.69	3.45
	0	0.04	0.12	0.38	0.74	1.57	2.17	3.15
	0	0.1	0.18	0.35	0.82	1.78	2.06	3.59
	0	0.06	0.11	0.39	0.69	1.53	2.26	3.7
	0	0.0525	0.145	0.345	0.7225	1.475	2.045	3.4725
	0	0.0377492	0.0351188	0.0591608	0.0767572	0.322542	0.2504	0.2381
